# Supplementary material
Source: PubMed Central journal article supplement (PMC2903406)
Supplement: supp_M110.120121_jbc.M110.120121-1.pdf [file supp_M110.120121_jbc.M110.120121-1.pdf]

Table 1. Dharmacon ON-TARGET plus™ SMARTpools® siRNA target sequences for PKC isoforms and primer/probe sequences for real-time PCR assays

| Isoform      |                          |                         |                          |                         |
|--------------|--------------------------|-------------------------|--------------------------|-------------------------|
| PKC $\delta$ | CCAUGUAUCCUGAG<br>UGGAA  | CCAAGGUGUUGAUGUC<br>UGU | AAAGAACGCUUCAACA<br>UCG  | CCGCACCGCUUCAAGG<br>UUC |
| PKC $\eta$   | GCACCUGUGUCGUCC<br>AUAA  | CCACGAGGGUCACUGU<br>AAA | UAACCAGGAUGAGUUU<br>AGA  | CAUAUUCGAUGUCAAG<br>CGA |
| PKC $\zeta$  | CGUCAAAAGCCUCCCA<br>UGUU | GCAGGACUUUGACCUA<br>AUC | GACCAAUUUACGCCA<br>UGA   | GAGUAUAUCAACCCAU<br>UAU |
| PKC $\iota$  | AGAAAUCAGUCUAG<br>CAUUA  | CAAGUGUUCUGAAGAG<br>UUU | GAGGAGACCUGAAUGUU<br>UCA | GCAAUGAACACCAGGG<br>AAA |

Sigma MISSION™ siRNA Human Kinase Panel sequences

| Isoform        |                                                |                                                |                                                |
|----------------|------------------------------------------------|------------------------------------------------|------------------------------------------------|
| PKC $\alpha$   | CACAUUCAGCAAGUAGGAATT<br>UUCCUACUUGCUGAAUGUGTT | CAAAGUGUGUGGCAAAGGATT<br>UCCUUUGCCACACACUUUGTT | CCAACAACCUUGACCGAGUTT<br>ACUCGGUCAAGGUUGUUGGTT |
| PKC $\beta$    | CAGAGUAAGGGCAUCAUUUTT<br>AAAUGAUGCCCUUACUCUGTT | GCAUCUACAUCAGGCCATT<br>UGGGCCUGGAUGUAGAUGCTT   | GAUGAACUCUCCAUCATT<br>UGGAUUGGAAGAGUUCAUCTT    |
| PKC $\gamma$   | CUGACUUUGGCAUGUGUAATT<br>UUACACAUGCCAAAGUCAGTT | GACUUGAGCGGAGCCGATT<br>AUCGGGCUCCGCUCAGUCTT    | CAGAAGACCCGAACGGUGATT<br>UCACCGUUCGGGUCUUCUGTT |
| PKC $\delta$   | CUCUUUGAAAGGGAACCAATT<br>UUGGUUCCCUUCAAGAGTT   | CAACCAAGAGGCUGGGAGUTT<br>ACUCCAGCCUCUUGGUUGTT  | CACAAGAAUUGCAUCGACATT<br>UGUCGAUGCAUUUCUUGUGTT |
| PKC $\epsilon$ | GUCAUCUACAGGGAUUUGATT<br>UCAAAUCCUGUJAGAUACTT  | GGAUUGAUCUGGAGCCAGATT<br>UCUGGCUCAGAUCAAUCCTT  | CAGAUUCAGCGCUCCCGAATT<br>UUCGGGAGCGCUGAAUCUGTT |
| PKC $\eta$     | CAAAGUGGAUUCAAAGAUUTT<br>AAUCUUUGAAUCCACUUUGTT | CAUGUUCUCCAUGAUAAATT<br>UUUAUCAUGGAGGAACAUGTT  | GAAUGCACCAUGACCGAGATT<br>UCUCGGUCAUGGUCAUUCTT  |
| PKC $\theta$   | CCAUGAUUGAGAGCACUCATT<br>UGAGUGCUCUCAUCAUGGTT  | GACAUUCAAGAUCCGCGATT<br>UCCGCGAUCUUGAUJUGUCTT  | GCUGAAACCUCAGGCCGATT<br>UCGGCCUUGAGGUUCAGCTT   |
| PKC $\zeta$    | GAUUGACCCUUUAACUGUATT<br>UACAGUUAAAGGGUCAUUCTT | GUUCGAAGGCUUUGAGUATT<br>AUACUCAAGCCUUCGAACTT   | GGACUUUGACCUAAUCAGATT<br>UCUGAUUAGGUCAAAGUCCTT |
| PKC $\iota$    | CUUUCCAAGCCAAGCGUUUTT<br>AAACGCUUGGCUUGGAAAGTT | GAAGAUUGAUCAGUCUGAATT<br>UUCAGACUGAUCAAUCUUCTT | GGAUUAUCUCUCCAAGUUTT<br>AACUUGGAAGAGAUAAUCCTT  |
