# Supplementary material
Source: PubMed Central journal article supplement (PMC2903406)
Supplement: supp_M110.120121_jbc.M110.120121-2.pdf [file supp_M110.120121_jbc.M110.120121-2.pdf]

## Primer and probe sequences for real-time PCR analysis of relative gene expression

| Gene              | Forward primer                         | Reverse primer                    | Probe                               |
|-------------------|----------------------------------------|-----------------------------------|-------------------------------------|
| MMP<br>-1         | AAGATGAAAGGTGGACAAAAT                  | CCAAGAGAATGGCCGAGTTC              | CAGAGAGTACAACCTACATCGTGTG<br>CGGCTC |
| MMP<br>-13        | AAATT ATGGAGGAGATGCCCAT                | TCCTTGAGTGGTCAAGACCTAA            | CTACAACCTGTTCTTGTGTGCTGCGCA<br>TGA  |
| 18S<br>rRNA       | CGAATGGCTCATTAATCAGTTAT<br>GG          | TATTAGCTCTAGAATTACCACAGTTA<br>TCC | TCCTTTGGTCGCTC GCTCCTCTCCC          |
| PKC<br>$\alpha$   | ACCATTCAAGCCCAAAGTGT                   | GGCTGTCCTCGTGTGAAGA               |                                     |
| PKC<br>$\beta$    | CCAGTGTGATGGCTGGTT                     | GGCACAGGCACATTGAAGTA              |                                     |
| PKC<br>$\gamma$   | CTGTATGAGATGTTGGCAGGAC                 | GTTCCATGATGGCCTGAAA               |                                     |
| PKC<br>$\delta$   | ATTATCCCCGCTGGATCAC                    | CTTGTTGGTTCCTTTCAA                |                                     |
| PKC<br>$\epsilon$ | TGACGACGTGCTGTACCC                     | GGGGATTCTTCGTCATGAAA              |                                     |
| PKC<br>$\eta$     | CTGTGGCACGCCAGACTAT                    | TCTACTGCAGGCCCGTACA               |                                     |
| PKC<br>$\theta$   | AGCTCTACTCGCTGGCTGA                    | GGCCTTGAGGTTTCAGCTCT              |                                     |
| PKC<br>$\zeta$    | CGGAACCCCGAATTACATC                    | ACCAGTCCACGCTGAACC                |                                     |
| PKC<br>$\iota$    | TCCCTTGTGTACCAGAACGTC                  | GGCACAATAAAGCTTTCTCCA             |                                     |
| <i>c-fos</i>      | ABi Assay on demand<br># Hs00170630 ml |                                   |                                     |
| <i>c-jun</i>      | GGAAGCTGGAGAGAATCGCC                   | TTCTGTTTAAGCTGTGCCACCTG           |                                     |
| MMP<br>-10        | GGACCTGGGCTTTATGGAGATAT                | CCCAGGGAGTGGCCAAGT                |                                     |

Assays with Probe used Taqman chemistry and FAM-TAMRA labelled probes, except *c-fos* (FAM). Assays with no probe listed used SYBR Green chemistry.
